# Supplementary material for: The Learning Curve After Implementation of Collaborative Care in a State Mental Health Integration Program
Source: Atypon-hosted journal article supplement (doi:10.1176/appi.ps.201800249), 2018-11-20
Supplement: appi.ps.201800249.ds001.pdf [file appi.ps.201800249.ds001.pdf]

**Organizational Learning of Collaborative Care in Washington State’s Mental Health Integration Program (MHIP) – Supplemental Figure and Tables**

| Depression Outcome Data |                       |                       |                       |                       |                       |                       |                       |                       |
|-------------------------|-----------------------|-----------------------|-----------------------|-----------------------|-----------------------|-----------------------|-----------------------|-----------------------|
| Organization            | Year                  |                       |                       |                       |                       |                       |                       |                       |
|                         | 1st                   | 2nd                   | 3rd                   | 4th                   | 5th                   | 6th                   | 7th                   | 8th                   |
| <b>A</b>                | 48.1%<br>(34.3, 61.8) | 52.7%<br>(45.3, 60.1) | 42.3%<br>(35.7, 48.9) | 39.0%<br>(30.5, 47.5) | 32.5%<br>(24.3, 40.7) | 29.3%<br>(18.5, 40.2) | 31.6%<br>(15.9, 47.3) | NA                    |
| <b>B</b>                | 41.4%<br>(20.9, 62.0) | 27.7%<br>(21.4, 34.1) | 44.4%<br>(38.2, 50.6) | 45.6%<br>(39.0, 52.1) | 53.3%<br>(46.6, 60.0) | 53.7%<br>(46.6, 60.8) | 56.4%<br>(48.1, 64.8) | 49.2%<br>(34.4, 64.0) |
| <b>C</b>                | 49.6%<br>(35.0, 64.3) | 34.8%<br>(27.3, 42.2) | 44.4%<br>(37.8, 51.0) | 44.1%<br>(37.5, 50.8) | 34.8%<br>(27.3, 42.3) | 39.0%<br>(31.3, 46.6) | 35.2%<br>(27.5, 42.9) | 34.2%<br>(21.6, 46.9) |
| <b>D</b>                | 30.3%<br>(21.9, 38.6) | 35.3%<br>(31.2, 39.3) | 35.1%<br>(31.8, 38.3) | 36.3%<br>(33.0, 39.7) | 35.8%<br>(31.6, 40.1) | 37.1%<br>(32.0, 42.1) | 38.3%<br>(32.1, 44.5) | 40.4%<br>(30.0, 50.8) |
| <b>E</b>                | 31.7%<br>(14.9, 48.5) | 29.3%<br>(17.7, 40.8) | 37.2%<br>(28.2, 46.3) | 57.5%<br>(49.9, 65.0) | 63.9%<br>(53.9, 74.0) | 54.0%<br>(42.4, 65.6) | 43.0%<br>(33.7, 52.3) | 37.7%<br>(20.5, 54.9) |
| <b>F</b>                | 26.8%<br>(14.3, 39.4) | 36.4%<br>(30.5, 42.3) | 45.7%<br>(41.2, 50.1) | 44.8%<br>(40.6, 49.0) | 48.9%<br>(43.8, 54.0) | 40.2%<br>(34.6, 45.8) | 34.1%<br>(27.8, 40.4) | 39.7%<br>(23.9, 55.6) |
| <b>G</b>                | NA                    | 61.4%<br>(53.0, 69.7) | 55.5%<br>(48.4, 62.6) | 44.6%<br>(37.8, 51.3) | 47.7%<br>(38.3, 57.1) | 51.3%<br>(40.0, 62.6) | 48.8%<br>(34.3, 63.3) | NA                    |
| <b>H</b>                | 40.3%<br>(21.1, 59.6) | 62.5%<br>(56.3, 68.8) | 47.5%<br>(43.6, 51.4) | 48.1%<br>(44.9, 51.4) | 53.8%<br>(49.9, 57.6) | 54.6%<br>(49.9, 59.3) | 39.8%<br>(33.4, 46.2) | 39.6%<br>(19.6, 59.6) |
| <b>MHIP Wide</b>        | 39.5%<br>(33.0, 46.0) | 43.1%<br>(40.5, 45.8) | 43.2%<br>(41.4, 45.0) | 43.5%<br>(41.7, 45.2) | 45.6%<br>(43.6, 47.7) | 44.8%<br>(42.3, 47.2) | 39.9%<br>(37.1, 42.7) | 41.8%<br>(35.8, 47.7) |

The **Depression Outcome Data Table** displays adjusted yearly mean rates of improvement (and 95 percent confidence intervals) in the clinical outcome (a PHQ-9 score of less than ten or a reduction in PHQ-9 score from baseline by 50 percent or greater by week twenty-four of treatment). Data are shown for all organizations (MHIP wide) as well as for each individual Community Health Center (CHC). “NA” indicates that the data are not available for that CHC at the specified year.

| Process-of-Care Outcome Data |                        |                       |                       |                       |                       |                       |                       |                       |
|------------------------------|------------------------|-----------------------|-----------------------|-----------------------|-----------------------|-----------------------|-----------------------|-----------------------|
| Organization                 | Year                   |                       |                       |                       |                       |                       |                       |                       |
|                              | 1st                    | 2nd                   | 3rd                   | 4th                   | 5th                   | 6th                   | 7th                   | 8th                   |
| <b>A</b>                     | 94.4%<br>(88.3, 100.6) | 82.8%<br>(76.8, 88.8) | 70.9%<br>(64.5, 77.2) | 68.6%<br>(60.3, 76.8) | 61.7%<br>(53.2, 70.2) | 47.3%<br>(35.8, 58.9) | 27.3%<br>(12.2, 42.5) | NA                    |
| <b>B</b>                     | 52.1%<br>(31.2, 72.9)  | 47.1%<br>(39.3, 54.9) | 72.2%<br>(66.5, 77.9) | 76.2%<br>(70.6, 81.9) | 80.9%<br>(75.6, 86.3) | 81.8%<br>(76.3, 87.3) | 83.5%<br>(77.5, 89.6) | 82.1%<br>(70.8, 93.4) |
| <b>C</b>                     | 83.1%<br>(72.1, 94.1)  | 75.1%<br>(68.1, 82.1) | 76.5%<br>(70.3, 82.7) | 73.6%<br>(67.1, 80.0) | 67.3%<br>(59.1, 75.5) | 65.8%<br>(57.7, 73.9) | 63.7%<br>(55.2, 72.2) | 55.4%<br>(41.0, 69.7) |
| <b>D</b>                     | 59.2%<br>(50.2, 68.3)  | 57.5%<br>(53.1, 61.9) | 75.5%<br>(72.5, 78.6) | 78.3%<br>(75.3, 81.3) | 80.6%<br>(76.9, 84.2) | 84.0%<br>(80.1, 87.9) | 76.7%<br>(71.1, 82.4) | 68.5%<br>(58.2, 78.8) |
| <b>E</b>                     | 63.7%<br>(45.7, 81.7)  | 42.0%<br>(28.3, 55.7) | 59.4%<br>(49.5, 69.3) | 75.9%<br>(69.3, 82.5) | 70.3%<br>(60.6, 79.9) | 66.1%<br>(54.9, 77.3) | 87.3%<br>(80.8, 93.8) | 76.6%<br>(60.3, 93.0) |
| <b>F</b>                     | 30.5%<br>(16.9, 44.1)  | 59.4%<br>(53.1, 65.7) | 74.3%<br>(70.2, 78.4) | 74.0%<br>(70.1, 77.9) | 67.1%<br>(62.1, 72.2) | 64.2%<br>(58.4, 70.0) | 52.8%<br>(45.7, 60.0) | 80.5%<br>(67.5, 93.6) |
| <b>G</b>                     | NA                     | 72.4%<br>(64.2, 80.6) | 76.6%<br>(70.1, 83.1) | 60.5%<br>(53.4, 67.6) | 72.3%<br>(63.5, 81.2) | 74.2%<br>(63.9, 84.4) | 84.3%<br>(73.6, 95.1) | NA                    |
| <b>H</b>                     | 70.4%<br>(52.7, 88.1)  | 82.5%<br>(77.5, 87.5) | 87.6%<br>(85.0, 90.3) | 83.1%<br>(80.6, 85.7) | 88.4%<br>(85.8, 90.9) | 86.4%<br>(83.0, 89.7) | 86.4%<br>(81.8, 90.9) | 74.3%<br>(56.1, 92.5) |
| <b>MHIP Wide</b>             | 67.4%<br>(61.5, 73.3)  | 66.3%<br>(63.7, 68.8) | 77.0%<br>(75.4, 78.5) | 76.2%<br>(74.6, 77.7) | 77.1%<br>(75.2, 78.9) | 76.0%<br>(73.9, 78.2) | 74.1%<br>(71.5, 76.8) | 73.0%<br>(67.7, 78.4) |

The **Process-of-Care Outcome Data Table** displays adjusted yearly mean rates of improvement (and 95 percent confidence intervals) in the process-of-care outcome (having at least one follow-up contact with the care manager and PHQ-9 assessment in the month following enrollment). Data are shown for all organizations (MHIP wide) as well as for each individual CHC. “NA” indicates that the data are not available for that CHC at the specified year.
